# Supplementary material for: Deciphering the photocatalytic hydrogen generation process of Fresnoite Ba2TiGe2O8 by electronic structure and bond analyses
Source: Royal Society of Chemistry journal article supplement (doi:10.1039/d2dt03969a), 2023-01-01
Supplement: d2dt03969a1.pdf [file d2dt03969a1.pdf]

Supporting Information for

Decipher the photocatalytic hydrogen generation process for  
Fresnoite  $\text{Ba}_2\text{TiGe}_2\text{O}_8$  by electronic structure and bond analyses

*Guangxiang Lu, Tao Yang\**

College of Chemistry and Chemical Engineering, Chongqing University, Chongqing

401331, People's Republic of China

\*Corresponding author: [taoyang@cqu.edu.cn](mailto:taoyang@cqu.edu.cn)

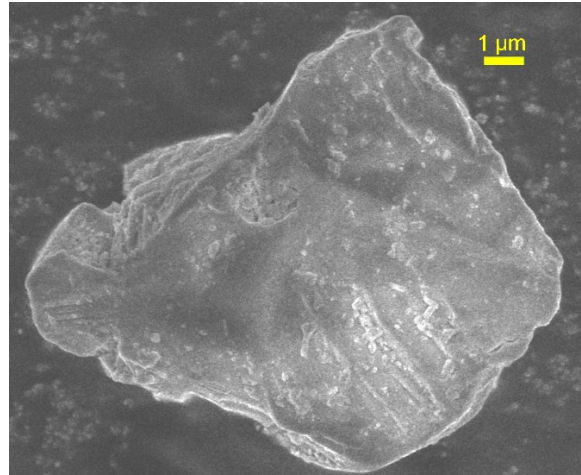

**Fig. S1.** SEM image for  $\text{Ba}_2\text{TiGe}_2\text{O}_8$ .

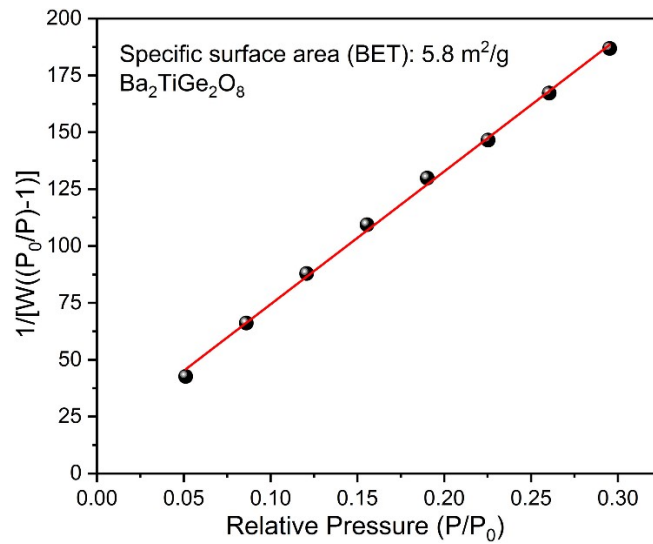

**Fig. S2.** Specific surface area for  $\text{Ba}_2\text{TiGe}_2\text{O}_8$  using BET method.

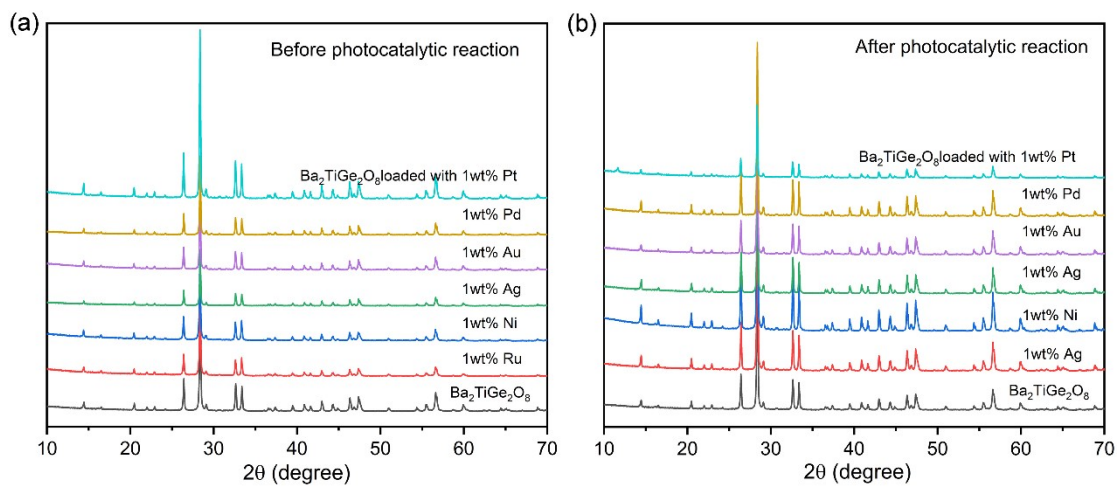

**Fig. S3.** Powder XRD patterns for  $\text{Ba}_2\text{TiGe}_2\text{O}_8$  (including those loaded with cocatalysts)

before and after the photocatalytic reactions.
